# Supplementary material for: Risk Factors and Changes of Peripheral NK and T Cells in Pulmonary Interstitial Fibrosis of Patients with Rheumatoid Arthritis
Source: Can Respir J. 2019 Dec 1;2019:7262065. doi: 10.1155/2019/7262065 (PMC6914899; doi:10.1155/2019/7262065)
Supplement: Supplementary Materials — The supplementary material provides the original data including general information, inflammatory factors, autoantibodies, percentage, and absolute number of peripheral lymphocyte subsets of a total of 100 RA and 100 RA-ILD patients, which can support the conclusion of this study. [file 7262065.f1.xlsx]

## Sheet: Sheet1
The original data of RA-ILD patients
patient	sex	age(year)	disease duration(year)	ACCP（IU/ml）	RF（IU/ml）	ESR（mm/h）	IgG(g/L)	IgA(g/L)	IgM(g/L)	CRP（mg/L	T（%）	B(%)	NK（%）	CD4+T（%	CD8+T（%）	Th1(%)	Th2(%)	Th17(%)	Treg(%)	T（cells/μl）	B（cells/μl）	NK（cells/μl）	CD4+T（cells/μl）	CD8+T（cells/μl）	Th1（cells/μl）	Th2（cells/μl）	Th17（cells/μl）	Treg（个/ULcells/μl）	Th17/Treg	treatment
1	male	72	0.75	1600	228	64	9.38	2.75	2.74	40.1	66.31	10.88	18.11	31.33	33.04	15.36	2.11	1.23	4.32	1089.71	178.64	297.27	515.58	543.72	79.19	10.88	6.34	22.27	0.28	NSAID, GC, DMARD
1	male	52	9	1395.4	1280	87	8.32	1.85	2.22	31.2	58.63	22.07	18.34	34.39	21.36	9.01	2.18	0.8	8.69	384.47	157.6	130.97	205.74	127.8	18.54	4.49	1.65	17.88	0.09	NSAID, GC
1	male	65	6	119.4	647	70	13.7	3.73	1.58	44.6	72	4	22	44	27	10.55	1.21	0.45	8.64	1488	74	443	931	559	98	11	4	80	0.05	NSAID, GC, DMARD
1	female	64	21	1600	11.4	120	19.5	4.44	2.12	98.4	77.21	4.37	13.62	41.66	32.41	15.56	1.81	0.61	5.14	1344.2	85.68	267.39	633.1	492.57	98.51	11.46	3.86	32.54	0.12	NSAID, GC
1	male	60	7	1600	1280	52	15.1	2.32	2.44	15.8	60.84	6.16	28.62	40.69	17.88	19.38	0.73	0.72	10	1173.74	123.74	574.82	751.12	330.09	145.57	5.48	5.41	75.11	0.07	NSAID, GC, DMARD, DMARD
1	male	61	0.47	277.8	565	120	18.2	4.91	1.82	98.8	71.47	10.72	16.7	29.57	40.55	11.84	4.31	0.82	1.55	822.68	122.96	191.54	341.62	468.48	40.37	14.7	2.8	5.29	0.53	NSAID
1	female	63	6	1600	160	80	13.8	1.84	0.74	89.3	67.48	10.82	19.91	41.26	23.4	6.21	1.07	0.72	9.58	611	95.65	175.94	382.35	216.8	23.74	4.09	2.75	36.63	0.08	NSAID, GC, DMARD
1	female	64	20	592.2	1280	120	50.7	4.38	2.88	43.1	75.93	18.51	5.11	32.78	41.92	9.78	1.21	0.44	4.96	1858.05	457.93	126.27	793.83	1015.11	77.64	9.61	3.49	39.37	0.09	NSAID, DMARD
1	male	68	0.17	1600	96.6	30	12.2	4.29	1.24	15.2	66.92	12.7	18.26	37.92	20.78	6.33	1.07	0.29	3.44	1701.58	340.63	489.89	912.91	500.18	57.79	9.77	2.65	31.4	0.08	NSAID, GC, DMARD
1	female	44	16	149.8	80	120	27.1	3.32	1.08	55.4	77.16	8.86	10.65	33.91	39.24	26.47	1.94	1.93	3.67	658.91	70.01	84.23	311.24	360.1	82.39	6.04	6.01	11.42	0.53	DMARD
1	male	61	5	1538.83	591	104	12.5	4.11	1.44	11.8	65.68	24.07	5.27	51.52	12.04	8.19	0.74	0.43	5.44	1212.85	447.3	97.97	945.16	220.97	77.41	6.99	4.06	51.42	0.08	NSAID, GC, DMARD
1	female	75	10	1404	1240	120	20	6.57	2.6	43.4	50	31	15	34	15	5	1.26	0.28	9.12	751	429	211	558	242	28	7	2	51	0.03
1	female	66	23	36.8	11.4	68	13	2.77	1.99	2.9	66	7	25	46	18	11.93	1.66	1.05	6.25	770	78	284	556	216	66	9	6	35	0.17	NSAID, GC, DMARD
1	female	55	0.5	951.9	1280	108	19.1	5.3	3.26	20.4	80.91	9.07	9.28	45.97	33.19	19.11	1.67	0.4	4.01	1869.76	215.85	220.77	1031.22	744.5	197.07	17.22	4.12	41.35	0.1
1	female	65	8	288.1	1280	120	29.1	4.63	3.3	14.7	66.49	21.33	9.69	52.69	13.14	19.05	1.21	1.59	3.45	467.42	154.54	70.25	358.92	89.52	68.2	4.33	5.69	12.35	0.46	DMARD
1	female	69	8	32.4	984	27	11.1	3.54	2.06	2.76	75.75	12.87	6.39	48.29	25.66	21.44	1.13	1.06	3.36	1362.17	233.45	115.8	860.5	457.2	184.38	9.72	9.12	28.9	0.32	GC, DMARD
1	male	70	7	1600	160	61	19.2	2.16	0.92	3.79	82.82	4.67	10.13	34.53	44.93	19.83	3.39	0.84	4.37	1362.39	79.23	172.02	549.9	715.48	108.87	18.61	4.61	23.99	0.19	NSAID
1	male	73	15	617.4	205	95	16	3.13	1.61	20.1	59.5	7.96	30.28	35.93	21.69	17.79	1.3	2.07	8.83	601.81	81.05	308.47	360.93	217.82	64.21	4.69	7.47	31.87	0.23	NSAID
1	male	63	27	1293.2	40	36	6.94	1.74	0.57	2.75	79.93	9.21	8.85	54.42	24.92	15.88	1.27	0.8	8.1	2268.92	259.46	249.32	1556.45	712.63	247.16	19.77	12.45	126.07	0.1	GC, DMARD
1	male	53	20	1504.6	1280	120	14.6	5.51	3.17	26.4	76	9	13	61	13	5.5	2.22	0.46	4.28	1099	129	198	854	187	46.97	18.96	3.93	36.55	0.11	NSAID
1	female	48	8	461.6	40	46	18.7	2.07	1.47	47.4	71	8	21	47	24	17.15	1.16	0.41	2.16	2187	238	669	1436	733	246.27	16.66	5.89	31.02	0.19	NSAID
1	male	52	3	179.3	320	37	11	3.91	0.9	9.58	76	12	10	51	23	14.1	2.67	0.22	5.58	1997	327	266	1310	578	184.71	34.98	2.88	73.1	0.04	NSAID, GC
1	male	66	40	197.8	320	43	10.1	2.41	1.16	43.2	78	5	16	22	53	2.68	1.75	0.72	2.29	735	46	142	212	520	5.68	3.71	1.53	4.85	0.31	NSAID, GC
1	male	66	1	332.5	160	53	12.4	3.24	1.45	23.2	50	11	38	31	15	1.7	0.25	1.24	3	368	79	270	237	114	4.03	0.59	2.94	7.11	0.41	GC
1	male	68	6	67.8	640	40	15.1	2.6	1.69	25.4	59.59	27.95	10.56	37.4	19.39	4.23	1.21	0.43	6.1	1924.95	867.54	327.74	1257.48	652.07	53.17	15.21	5.41	76.68	0.07	GC
1	female	64	10	807.4	656	80	16.3	5.05	1.83	18.8	66.57	10.12	20.94	38.44	24.47	15.91	1.27	1.06	2.82	1292.13	206.67	427.5	705.49	449.18	112.24	8.96	7.48	19.89	0.38	NSAID, GC
1	female	62	15	349.9	537	70	10.8	2.39	1.68	30	73.71	15.09	9.15	59.49	12.53	6.23	1.11	0.39	1.83	1761.32	336.22	203.94	1516.84	319.46	94.5	16.84	5.92	27.76	0.21	GC, DMARD, DMARD
1	male	77	5	709.6	80	83	11.9	1.87	0.55	40.6	68.7	10.92	18.56	46.85	21.04	30.61	1.11	0.89	2.48	795.09	130.82	222.3	523.29	235	160.18	5.81	4.66	12.98	0.36	NSAID, GC, DMARD
1	female	66	25	1600	40	50	16.9	4.48	1.56	8.51	68.74	7.39	23.46	25.85	40.03	33.28	0.76	0.48	3.6	1425.65	162.67	516.35	503.3	779.36	167.5	3.83	2.42	18.12	0.13	NSAID, GC
1	female	69	0.83	399.9	878	120	13	1.6	2.02	156	71.46	4.59	20.55	22.63	50.16	24.21	2.11	0.72	8.44	1079.22	72.88	326.34	323.15	716.27	78.23	6.82	2.33	27.27	0.09	NSAID, GC
1	female	58	8	891.7	40	91	12	3.02	1.11	15.4	71.77	12.08	12.39	46.68	25.72	12.57	1.55	0.32	4.85	970.04	169.43	173.79	608.01	335.06	76.43	9.42	1.95	29.49	0.07	NSAID, DMARD
1	male	79	8	416.1	1350	50	9.54	2.71	1.17	77.2	85.65	8.48	4.35	47.5	34.04	13.51	1.64	1.11	2.24	1015.62	93.7	48.05	602.86	432.1	81.45	9.86	6.69	13.5	0.5	NSAID, GC, DMARD
1	male	69	7	1600	80	7	7.13	2.74	0.34	2.14	81.14	4.53	11.37	48.42	31.24	30.94	0.72	1.38	4.52	939.55	54.02	135.6	542.98	350.35	168	3.91	7.49	24.54	0.31	GC, DMARD, Biological agent
1	male	57	6.25	1600	320	30	8.41	3.95	1.08	3.84	74.49	11.05	13.28	47.57	26.68	18.64	0.63	0.33	7	1586.36	242.59	291.64	981.75	550.65	183	6.19	3.24	68.72	0.05	NSAID, GC, DMARD
1	male	65	3	1080.6	20	54	10.3	3.44	0.19	33	71.67	6.92	21.09	42.65	30.4	26.83	0.22	0.64	3.11	1392.43	137.26	418.36	811.91	578.73	217.84	1.79	5.2	25.25	0.21	NSAID, GC, DMARD
1	male	62	3	135	728	67	23.2	4.79	1.48	15.1	67.1	13.12	15.19	30.51	19.59	11.67	1.07	0.56	2.26	1291.39	256.11	296.59	578.25	371.33	67.48	6.19	3.24	13.07	0.25	NSAID, DMARD
1	female	65	2.5	785.8	160	100	12.4	3.93	1.62	8.1	60.26	30.87	5.68	41.65	16.24	11.7	1.26	0.89	2.63	1004.41	526.37	96.92	677.65	264.28	79.29	8.54	6.03	17.82	0.34	NSAID, DMARD
1	female	59	0.5	1042.6	20	46	15.5	1.84	0.54	11	62.03	5.86	28.95	36.78	25.83	7	1.26	0.8	2.72	851.07	79.62	392.94	509.61	357.97	35.67	6.42	4.08	13.86	0.29	NSAID
1	female	79	1	131.4	320	120	10.1	4.58	0.48	122	72	7.47	17.66	38.35	32.23	5.28	0.72	0.6	4.7	878.14	79.83	188.66	527.03	442.89	27.83	3.79	3.16	24.77	0.13	GC
1	female	67	0.25	263.6	160	30	19.2	1.88	2.34	2.37	77.16	10.32	10.83	40.69	32.32	20.18	1.28	0.85	7.4	1032.89	136.01	142.61	553.45	439.54	111.69	7.08	4.7	40.96	0.11
1	female	76	50	79.7	160	21	12.2	1.6	1.06	1.6	60.44	11.63	24.41	34.93	24.84	10.72	0.79	0.2	2.29	951.65	183.41	385.1	548.83	390.31	58.83	4.34	1.1	12.57	0.08	GC, DMARD
1	female	46	11	853.4	11.4	5	9.66	0.52	0.44	6.31	89.27	4.56	4.56	50.22	29.67	3.44	1.36	0.51	3.97	2149.28	110.35	110.35	1203.77	711.13	41.38	16.36	6.14	47.76	0.13	GC, DMARD, DMARD, DMARD
1	male	57	12	716.5	160	36	12.5	5.58	1.01	5.71	59.28	10.5	27.97	35.1	20.13	18.33	0.2	2.3	2.9	1260.66	235.46	627.27	705.24	404.53	129.27	1.41	16.22	20.45	0.79	NSAID, GC
1	female	53	19	645.7	320	46	8.52	3.23	0.87	14.3	61.72	12.9	25.17	27.14	28.99	23.83	2.37	1.62	8.48	1154.38	233.84	456.45	522.26	557.86	124.45	12.38	8.46	44.29	0.19	NSAID, DMARD
1	female	63	23	567.7	80	24	12.7	3.77	2.34	2.79	58.36	26.27	12.37	36.68	16.01	26.89	0.74	1.28	3.42	1040.02	479.92	225.93	637.23	278.02	171.35	4.72	8.16	21.79	0.37	Biological agent
1	female	69	5	345.3	160	120	10.9	1.49	1.95	144	71	8	18	42	27	1.63	0.78	0.41	2.88	696	83	181	404	262	6.59	3.15	1.66	11.64	0.14	NSAID, GC
1	male	66	1.5	1213.7	640	80	11.3	2.81	1.61	15.9	77.63	9.52	11.19	59.42	24.26	23.5	1.61	1.46	7.2	1699.96	222.84	261.97	1208.71	493.47	284.05	19.46	17.65	87.03	0.2	NSAID, GC, DMARD
1	female	74	10	1193.8	24.1	120	23.7	2.97	1.44	9.53	63	5	29	25	31	31.62	1.2	0.74	7.56	797	68	366	322	390	102	4	2	24	0.1	NSAID, GC, DMARD
1	female	39	10	164.3	40	87	12.5	5.37	0.69	97.7	76.97	4.8	16.7	30.31	33.76	3.52	1.55	0.5	1.28	590.99	33.98	118.13	251.59	280.22	8.84	3.89	1.26	3.21	0.39	NSAID, GC, DMARD
1	female	68	30	1395.1	44.4	53	5.23	1.2	0.36	9.1	81.19	5.88	11.66	55.04	24.28	14.04	1.11	0.39	2.2	2082.24	147.83	293.34	1438.76	634.75	202	15.97	5.61	31.65	0.18	NSAID, GC, DMARD, DMARD
1	female	73	13	859.7	179	53	12.3	5.6	0.53	3.03	74.81	6.65	16.07	45.38	26.95	31.82	1.63	0.6	1.86	2379.43	211.65	511.18	1443.39	857.09	459.29	23.53	8.66	26.85	0.32	GC, DMARD
1	male	73	20	115.1	160	75	15.2	3.35	0.86	37.4	66.08	4.06	28.29	23.67	30.58	30	2.06	0.6	7	1448.12	93.73	653.6	491.01	634.41	147.3	10.11	2.95	34.37	0.09
1	female	66	0.58	218.1	640	50	13.1	3.29	1.42	3.33	66.89	12.52	18.57	48.21	18.21	14.26	0.73	0.42	2.13	1576.49	299.14	443.59	1120.9	423.39	159.84	8.18	4.71	23.88	0.2	NSAID
1	female	53	3	0	11.4	90	23.2	3.04	1.89	92.5	78.33	11.64	8.74	55.84	16.94	7.22	1.24	0.43	2.64	1671.84	248.13	186.31	1193.12	362.04	86.14	14.79	5.13	31.5	0.16	NSAID
1	male	60	12	1600	453	5	10.7	3.08	1.02	2.94	77.49	3.36	18.08	54.61	23.75	12.44	1.2	0.22	4.85	1275.16	57.87	310.98	859.32	373.83	106.9	10.31	1.89	41.68	0.05	GC, DMARD
1	female	50	6	49.2	234	50	15.5	3.66	1.92	22.7	85.35	7.73	6.63	36.42	43.21	12.12	1.64	0.61	4.16	1188.53	111.4	95.64	489.3	580.56	59.3	8.02	2.98	20.35	0.15	NSAID
1	female	62	3.5	75.7	20	38	13.5	3.25	0.5	35.4	69	11	17	37	25	4.78	0.98	0.8	1.85	405	68	106	211	141	10.09	2.07	1.69	3.9	0.43	GC
1	female	47	10	312.1	640	115	20.3	4.37	3.95	17.4	76	11	12	43	29	6.02	4.06	0.5	5.1	381	54	61	215	148	12.94	8.73	1.08	10.97	0.1	GC, DMARD
1	male	68	0.25	81.7	640	120	10.8	2.24	3.25	32.3	71.49	9.11	18.01	22.8	46.89	34.25	0.75	0.34	12.24	603.45	77.39	152.99	191.16	393.17	65.47	1.43	0.65	23.4	0.03	NSAID, GC
1	male	63	0.42	43.4	73.4	53	20.5	2.97	1.03	73.2	73.41	7.61	17.5	36.86	31.71	13.58	1.42	2.29	5.14	1728.6	184.41	424.15	841.78	724.13	114.31	11.95	19.28	43.27	0.45	NSAID, DMARD, DMARD
1	female	83	10	939.5	160	91	13.4	6.55	2.15	53.4	87.23	3.16	7.33	28.43	56.73	26.06	1	1.52	5.17	1142.13	40.52	93.93	380.35	658.91	99.12	3.8	5.78	19.66	0.29	GC, DMARD, DMARD
1	male	54	1.75	1600	320	15	11.1	1.65	1.95	2.13	67.54	18.39	12.41	40.16	26.33	8.51	0.5	0.8	6.81	2184.81	555.19	374.73	1387.17	909.38	141.56	8.32	13.31	113.28	0.12	DMARD, DMARD
1	female	71	24	1478.1	1280	95	13.2	2.54	0.85	20.8	60.24	12.81	22.07	40.68	17.94	12.2	0.8	1.04	6.22	1581.49	345.24	594.48	1039.03	458.1	126.76	8.31	10.81	64.63	0.17
1	female	66	10	1600	320	80	6.43	1.7	2.45	66.2	68	14	16	35	33	41.88	1	1.56	4.23	697	145	162	351	331	147.04	3.51	5.48	14.85	0.37	GC, DMARD, DMARD
1	female	68	14	1542.6	320	100	18.9	4.51	1.81	29.1	62	22	15	38	23	7.17	1	1.33	2.4	1789	599	392	1172	698	100	14	18	33	0.55
1	male	72	7	521.9	1280	120	13.4	3.5	2	147	61.02	5.97	28.32	41.55	17.63	2	1.04	0.25	5.2	602.16	61.11	289.71	394.6	167.44	16.2	8.42	2.02	42.11	0.05	NSAID, GC
1	male	72	1.17	1600	320	61	18.4	2.21	1.45	12.8	63.64	8.93	25.47	40.25	20.42	16.02	1	0.47	2.67	1167.21	158.53	452.2	761.74	386.47	122.03	7.62	3.58	20.34	0.18	NSAID, DMARD
1	female	55	20	1600	40	21	11.8	2.8	0.63	1.47	69.25	20.07	7.61	48.86	18.01	7.82	1.2	0.42	3.52	1737.81	495.67	187.84	1245.28	459.09	97.38	14.94	5.23	43.83	0.12	NSAID
1	male	63	1.3	1600	80	13	10.6	2.9	1.4	2.89	62.62	13.2	21.88	33.11	20.74	17	0.6	1.47	1.55	2363	479.54	794.69	1295.41	811.58	220.22	7.77	19.04	20.08	0.95	GC, DMARD, Biological agent
1	male	76	0.75	1600	640	72	16.4	4.3	0.92	27.2	38.4	10.5	46.72	22.22	9.21	12.3	0.7	0.28	3.08	628.6	168.46	749.3	371.64	154.08	45.71	2.6	1.04	11.45	0.09	NSAID
1	female	49	20	1147.2	80	13	10.5	1.88	0.52	2.57	64.32	25.31	8.18	45.08	18.56	20.22	0.6	0.8	2.78	2144.97	856.02	276.73	1482.05	610.04	299.67	8.89	11.86	41.2	0.29	NSAID, GC, DMARD, DMARD
1	female	59	20	121.1	320	120	22.5	3.27	1.08	57.7	72.55	10.09	15.42	31.87	35.93	20	0.68	0.53	2.98	1428.64	192.26	293.74	648.73	731.3	129.75	4.41	3.44	19.33	0.18	NSAID
1	male	61	6	383.9	80	83	16	5.26	0.42	66	60.06	8.49	31	18.67	35.63	20	1.1	0.64	6.32	1099.82	148.03	540.45	357.68	682.85	71.54	3.93	2.29	22.61	0.1
1	female	68	14	895.3	160	37	17.5	2.3	1.6	20.1	58.08	17.46	22.09	29.24	21.33	14.13	0.87	1.66	5.03	326.05	95.92	121.33	167.6	122.23	23.68	1.46	2.78	8.43	0.33	GC, DMARD
1	male	67	8	1600	1280	108	23.8	3.69	2.75	6.92	67.18	24.76	3.41	40.65	21.96	9	1.14	0.34	9.3	832.59	310.71	42.86	497.22	268.55	44.75	5.67	1.69	46.24	0.04	NSAID, DMARD, DMARD
1	female	64	14	625.7	640	100	27.8	3.74	2.04	14.4	77.86	8.31	10.95	22.43	52.19	21.8	1.2	0.57	6.11	1917.9	212.27	279.72	531.89	1237.47	115.95	6.38	3.03	32.5	0.09	NSAID
1	female	65	5	193.7	252	35	18.1	2.85	1.44	3.01	82.09	3.95	12.14	38.81	40.27	30.2	0.8	0.55	4.4	807.88	36.57	112.44	404.83	420.12	122.26	3.24	2.23	17.81	0.13	NSAID
1	female	59	10	675.9	1280	120	20.5	6.48	5.4	33.6	39.33	16.32	41.41	12.67	22.89	35.26	0.74	2	5	548.91	220.14	558.64	182.83	330.28	64.47	1.35	3.66	9.14	0.4
1	female	51	2.5	1151.7	320	53	14.5	2.2	2.04	91.6	67.76	4.82	24.21	37.61	19.67	3.74	0.26	0.44	5.6	1247.38	84.43	424	726.36	379.99	27.17	1.89	3.2	40.68	0.08	GC
1	female	59	9	909.6	640	120	12.6	2.52	1.29	11.8	72.57	11.95	11.8	43.22	30.07	14.08	0.27	0.8	5.17	1305.43	214.81	211.97	778.08	541.46	109.55	2.1	6.22	40.23	0.15	NSAID, GC, DMARD
1	female	51	16	755.7	1280	75	14.4	1.91	1.94	30.8	74.24	14.72	8.78	49.04	21.74	17.75	1.05	0.52	2.36	1458.23	295.36	176.16	942.86	418.09	121.15	7.17	3.55	16.11	0.22	NSAID, GC
1	female	59	30	685	160	68	20.6	3.62	1.8	13.2	83.16	5.4	10.23	41.74	42.08	11	1	0.6	6.16	565.58	39.45	74.68	263.53	265.67	33.85	3.08	1.85	18.96	0.1
1	male	77	1	425.5	160	68	13.8	3.6	0.9	8.74	57.32	3.59	36.74	22.4	33.2	10	0.74	0.4	6.73	1259.56	79.43	813.76	488.3	723.75	48.83	3.61	1.95	32.86	0.06	GC, DMARD
1	male	65	0.08	1600	640	100	12.4	4.57	2	22.1	53.67	12.32	29.41	30.19	20.37	26.85	1.04	2.23	5.22	927.05	213.55	509.53	519.72	350.65	139.54	5.41	11.59	27.13	0.43
1	female	78	0.83	1600	80	64	8	1.76	0.22	25.8	80.05	8.09	11.34	51.92	27.66	10.17	0.38	1	4.17	1158.98	118.38	165.84	744.07	396.31	75.67	2.83	7.44	31.03	0.24	GC, DMARD, Biological agent
1	female	82	36	1600	80	64	5.83	3.75	0.27	133	69.39	10.7	16.49	28.24	40.46	11.46	0.53	0.55	1.8	289.24	43.64	67.21	120.33	172.36	13.79	0.64	0.66	2.17	0.31	GC, DMARD
1	female	73	48	1125.8	320	53	8.75	4.15	0.33	6.02	74.77	13.28	11.7	34.84	36.78	21	1.11	0.9	5.75	451.29	79.58	70.14	211.74	223.52	44.47	2.35	1.91	12.18	0.16	GC, DMARD
1	male	61	4	961.6	20	5	12.9	2.23	0.54	2.8	71.03	13.23	13.07	41.82	27.83	33.2	1.26	0.44	7.34	1810.09	329.37	325.29	1091.41	726.26	362.35	13.75	4.8	80.11	0.06	NSAID
1	male	67	1	795.5	20	18	11.3	2.01	1.14	4.85	76.57	5.02	16.42	45.74	28.91	22.16	0.77	1	2.48	2201.71	142.6	466.78	1329.66	840.51	294.65	10.24	13.3	32.98	0.4	GC, DMARD
1	female	52	8	60.9	11.4	80	11.7	3.62	1.48	23.6	81.02	10.8	5.97	51.41	25.83	13.46	0.64	0.6	2	1570.33	206.57	114.26	1009.49	507.21	135.88	6.46	6.06	20.19	0.3	NSAID
1	male	73	5	1600	20	30	13.6	3.23	1.8	15.3	66	10	21	53	14	20	0.74	1.48	9.93	430	63	128	374	101	75.67	3	6	37.57	0.15	NSAID, GC, DMARD
1	male	56	1	1014.6	320	35	6.72	1.91	0.46	7.1	77.18	10.29	9.16	49.53	24.63	10	0.63	1.7	3.05	1053.69	135.49	120.59	700.68	348.39	70.07	4.41	11.91	21.37	0.56	NSAID, GC, DMARD
1	female	66	10	330	80	43	12.3	2.66	0.84	3.41	77.98	10.9	9.01	47.69	27.63	16.86	1.02	1.36	2.3	1390.69	189.73	156.88	871.78	505.09	146.98	8.89	11.86	20.05	0.59	NSAID
1	male	50	0.083	412.2	160	60	15	5.4	1.25	79.5	63.41	7.88	25.34	44.9	14.79	13.25	0.75	0.48	1.33	1483.02	179.54	577.59	1077.64	355.07	142.79	8.08	5.17	14.33	0.36
1	male	73	3	394.7	640	98	20.3	7	2.22	110	65.27	18.71	15.64	32.25	32.88	12.42	1.28	0.34	3.15	1296.98	375.62	313.92	634.2	646.49	78.77	8.12	2.16	19.98	0.11	NSAID
1	female	79	0.5	1600	320	80	17.4	2.78	0.92	10.3	80.63	4.95	10.61	37.1	32.66	31	0.7	1	3.26	1290.75	79.14	169.58	595.06	523.81	184.47	4.17	5.95	3.26	0.31
1	female	57	6	1144.7	540	75	23.2	4.03	2.82	2.96	66.27	21.59	7.97	36.44	26.19	4.72	0.38	0.08	4.52	1663.5	518.05	191.26	954.4	685.94	129.99	3.63	0.76	43.14	0.02	GC
1	female	56	0.75	0	11.4	24	12.2	2.3	0.4	8.87	75.86	16.8	4.18	49.73	23.44	14	1.22	0.73	3.64	1302.03	281.72	70.15	873.7	411.73	122.32	10.66	6.38	31.8	0.2	NSAID
1	male	70	7	1600	160	61	13.9	3	2	15	75.34	6.11	16.55	42.38	31.09	4.88	1.12	0.33	3.58	990.17	76.32	206.65	585.29	429.39	28.56	6.56	1.93	20.95	0.09
1	female	75	7	0	11.4	46	8.12	2.43	1.71	76.7	68.9	6.7	23.57	31.4	35.2	20.81	1.2	0.27	7.37	375.19	37.83	133.07	164.65	184.57	34.26	1.98	0.44	12.13	0.04	GC, DMARD
The original data of RA patients
patient	sex	age(year)	disease duration(year)	ACCP（IU/ml）	RF（IU/ml）	ESR（mm/h）	IgG(g/L)	IgA(g/L)	IgM(g/L)	CRP（mg/L	T（%）	B(%)	NK（%）	CD4+T（%	CD8+T（%）	Th1(%)	Th2(%)	Th17(%)	Treg(%)	T（cells/μl）	B（cells/μl）	NK（cells/μl）	CD4+T（cells/μl）	CD8+T（cells/μl）	Th1（cells/μl）	Th2（cells/μl）	Th17（cells/μl）	Treg（个/ULcells/μl）	Th17/Treg	treatment
2	female	36	0.17	392	160	36	15.3	3.94	2.31	2.19	74	13	11	44	26	9.52	1.81	1.05	2.65	1475	240	203	952	555	90.63	17.23	10	25.23	0.4	NSAID（7.5）, DMARD（200，bid)
2	female	64	10	45.7	40	43	9.47	2.24	0.29	48.4	71	20	8	45	24	9.92	0.24	0.27	4.01	1615	450	186	1001	542	99.3	2.4	2.7	40.14	0.07	NSAID, GC, DMARD, DMARD7.5
2	male	35	0.083	462.4	160	24	12.2	1.89	1.06	7.6	61	18	19	35	22	4.58	0.72	1.53	14.98	1670	465	507	973	620	44.56	7.01	14.89	145.76	0.1	NSAID
2	female	51	3.75	309.9	20	64	12.4	1.51	1.41	10.4	65	9	25	41	16	1.2	2	0.8	7.1	878	119	333	556	220	6.67	11.12	4.45	39.48	0.11	NSAID, DMARD, DMARD10
2	male	57	5	83.1	1280	100	14.3	3.81	3.15	31.8	58	11	28	42	12	4.44	1.72	0.4	11.44	951	191	473	679	203	30.15	11.68	2.72	77.68	0.03	GC, DMARD
2	female	79	20	370.4	40	72	10.4	2.76	0.87	36.4	68	10	20	50	14	10.85	1.07	0.29	5.06	1457	201	412	1105	321	119.89	11.82	3.2	55.91	0.06	NSAID, GC, DMARD
2	female	53	8	35.8	80	23	11.5	1.74	1.64	1.49	81	11	7	55	23	18.84	1.03	0.47	3.5	1406	198	126	941	396	177.28	9.69	4.42	32.94	0.13	NSAID, DMARD, Biological agent
2	female	64	4	1600	640	108	17.4	3.79	1.19	105	88	6	5	49	33	37.22	2.72	0.56	6.5	1765	111	99	966	659	359.55	26.28	5.41	62.79	0.09	NSAID
2	female	66	14	76.7	40	48	13.6	1.42	1.63	38.9	78	5	17	60	16	20.44	1.92	1.89	5.6	680	39	145	530	139	108.33	10.18	10.02	29.68	0.34	NSAID, GC
2	female	40	9	458.2	40	46	21.3	2.6	0.72	33.6	70	12	17	48	16	2.69	1.73	0.67	4.64	775	138	191	519	173	13.96	8.98	3.48	24.08	0.14	NSAID, GC, DMARD, Biological agent
2	female	48	10	356	1280	120	11.5	3.19	1.02	104	75	18	6	46	27	1.13	1.25	0.24	6.78	752	180	64	460	270	5.24	5.8	1.11	31.46	0.04	GC
2	female	50	2	64.9	80	100	15.3	2.63	2.25	62.4	77	12	9	55	19	3.93	1.74	0.66	5.52	890	146	109	632	214	24.84	11	4.17	34.89	0.12	NSAID
2	female	68	4	0	11.4	62	8.92	1.4	0.95	126	80	5	15	35	41	5.67	1.85	1.21	7.65	883	61	165	384	449	21.77	7.1	4.65	29.38	0.16	NSAID, DMARD, DMARD
2	female	52	1	0	11.4	120	14.1	5.25	1.05	108	83	8	8	54	27	2.24	0.49	0.34	4.83	1611	163	166	1022	514	22.89	5.01	3.47	49.36	0.07	NSAID, DMARD
2	female	63	22	132.2	160	75	13.6	3.4	1.39	25.1	68	11	19	44	20	6.54	1.67	1.87	4.12	678	109	182	458	202	29.95	7.65	8.54	18.87	0.45	GC, DMARD, Biological agent
2	female	30	5	29.7	30	100	24.1	1.83	3.08	121	78	12	10	39	28	2.82	1.67	0.85	3.95	1153	175	147	576	416	16.24	9.62	4.9	22.75	0.22	NSAID, Biological agent
2	female	26	9	316.8	20	15	9.18	1.84	1.54	23.9	76	13	10	32	35	11.84	2.14	0.61	2.66	1623	279	213	668	745	79.09	14.3	4.07	17.77	0.23	NSAID, DMARD, DMARD
2	male	67	10	0	11.4	40	10.5	1.52	0.82	55.1	87	4	7	27	43	4.26	0.62	0.78	3.66	856	43	65	262	418	11.16	1.62	2.04	9.59	0.21	GC, DMARD
2	female	45	3	304.9	160	120	15.9	3.5	2.06	36	87	6	5	43	37	14.66	1.96	0.44	1.78	1167	79	63	605	523	88.69	11.86	2.66	10.77	0.25	NSAID
2	male	42	11	476.1	80	95	12.4	3.48	1.31	2.42	75	11	13	46	27	1.67	0.86	0.56	1.9	1451	218	244	907	526	15.15	7.8	5.08	17.23	0.29	NSAID, GC
2	female	61	4	37.7	20	53	13.7	1.32	0.85	7.44	64.43	12.47	21.82	29.84	32.85	2.03	0.51	0.67	10.66	1026.39	184.72	323.27	509.07	560.42	10.33	2.6	3.41	54.26	0.06	DMARD
2	female	70	20	113.2	20	33	18.9	3.4	0.81	6.85	62	16	20	39	21	13.53	0.92	0.66	2.01	1316	336	416	841	441	113.79	7.74	5.55	16.9	0.33	NSAID, DMARD
2	female	66	18	272.2	40	120	20.2	2.77	1.57	72.3	68	20	11	36	32	12.96	1.78	0.85	2.52	578	162	94	315	279	40.82	5.61	2.68	7.94	0.34	NSAID,
2	female	51	14	31.8	11.4	120	19.8	2.89	0.73	4.91	69	17	12	42	25	4.19	0.42	0.19	2.63	1385	336	233	856	509	35.87	3.6	1.63	22.51	0.07	GC, Biological agent
2	female	49	7	363.3	20	24	11	3.52	0.9	16.7	81.24	10.12	6.47	53.22	24.47	5.12	0.72	0.18	2.9	1864.76	239.11	153.03	1184.4	544.6	60.62	8.52	2.13	34.34	0.06	NSAID
2	male	42	7	300.6	1280	120	16.9	3.99	2.49	16.7	70.28	23.67	3.99	43.3	23.61	27.93	2.17	1.26	11.48	1731.93	585.53	98.62	1062.8	579.6	296.62	23.05	13.38	121.92	0.11	NSAID
2	female	47	5	59.3	160	33	11.6	2.8	1.12	10.5	70.63	11.83	14.47	34.19	32.7	10.88	0.74	1.55	3.53	1191.24	192.17	235.04	598.02	571.9	65.06	4.43	9.27	21.11	0.44
2	female	54	30	1600	40	108	8.28	2.56	1.06	37.4	76.98	7.82	12.98	48.9	25.86	6.83	1.11	0.15	1.27	736.92	74.78	124.02	468.92	247.98	32.03	5.21	0.7	5.96	0.12	NSAID, GC
2	male	41	10	454.8	640	39	17.8	1.97	1.65	30.6	86.81	7.13	5.55	54.42	24.15	14.7	1.3	0.82	2.47	1113.58	88.55	68.93	720.16	319.58	105.86	9.36	5.91	17.79	0.33	GC
2	male	36	1	237.9	320	18	12.2	3.3	1.28	14	72.11	13.26	12.66	45.87	24.14	7.8	1.2	1	3.03	1396.46	249.55	238.35	913.29	480.56	71.24	10.96	9.13	27.67	0.33	NSAID
2	male	58	20	485.4	1280	36	12.1	1.66	2.18	6.13	36.71	55.87	3.52	24.19	7.16	8.15	0.85	0.74	2.4	389.26	568.83	35.83	267.27	79.1	21.78	2.27	1.98	6.41	0.31	DMARD, DMARD
2	female	58	6	76.7	348	120	17.1	4.68	1.31	67.7	73.14	12.07	13.72	36.27	35.79	28.3	1.21	0.67	4.37	1322.74	220.66	250.68	649.17	640.59	183.72	7.85	4.35	28.37	0.15	NSAID, DMARD
2	female	25	1.5	127.6	160	61	15.8	1.83	2.61	17.2	74.11	17	6.3	29.86	41.22	11.04	1.23	0.89	6.56	971.26	213.51	79.13	408.51	563.88	45.1	5.02	3.64	26.8	0.14	DMARD, Biological agent
2	female	66	3.8	57.8	320	50	14.8	2.58	1.72	4.27	73	6	21	34	36	40	0.99	1.27	6.2	1111	90	311	529	550	211.63	5.24	6.72	32.8	0.2	NSAID
2	male	48	4	137.6	320	2	10.8	1.38	0.61	3.96	73.5	16.55	8.77	48.08	22.34	16.89	1.21	0.59	7.29	1214.83	282.4	149.58	768.97	357.37	129.88	9.3	4.54	56.06	0.08	NSAID
2	female	47	16	898.3	57.5	24	15.3	3.64	0.94	1.17	68.93	5.86	23.59	37.18	28.08	25.22	1.47	1.37	2.73	1331.98	108.03	434.7	750.64	566.84	189.31	11.03	10.28	20.49	0.5	GC, DMARD
2	female	64	2	31.1	160	58	11.5	2.12	2.19	0.15	83.51	5.13	10.3	35.65	41.1	42.87	1.77	1.26	12	1253.39	75	150.63	537.38	619.53	235.35	9.72	6.92	65.88	0.11	NSAID, GC
2	male	55	12	0	20.5	108	14.1	3.82	0.5	65	80.62	3.25	13.13	59.82	20.1	4.82	0.82	0.32	5.88	1385.79	52.25	211.09	1095.76	368.2	52.82	8.99	3.51	64.43	0.05	NSAID, GC, DMARD, Biological agent
2	female	51	10	0	11.4	63	14.3	3.93	1.52	5.34	67.98	25.14	6.06	49.12	18.31	10.41	2.11	0.66	5.52	1259.31	461.5	111.25	918.17	342.25	95.58	19.37	6.06	50.68	0.12	NSAID, GC
2	female	76	11	1600	19.2	27	9.3	1.21	1.65	6.44	80.88	6.6	11.69	57.75	15.46	8.99	1.11	0.22	8.42	1010.71	80.45	142.55	738.64	197.72	66.4	8.2	1.63	62.19	0.03	NSAID, GC, DMARD
2	female	62	9	67.9	80	40	14.7	1.25	1.72	23.8	78	13	7	50	25	18.8	2.25	0.47	3.17	863	147	80	552	273	103.78	12.42	2.59	17.5	0.15	NSAID
2	male	38	0.83	519.6	160	13	12.3	2.29	1.01	3.82	73.52	18.02	6.45	41.3	25.67	17.92	2.09	1.08	5.54	1519.78	388.88	139.13	816.8	507.63	146.23	17.05	8.81	45.21	0.19	NSAID
2	female	65	22	41.5	11.4	120	16.5	6.77	0.62	3.12	76.29	12.19	8.37	37.69	31.75	11.84	1.41	0.29	3.14	1522.61	232.61	159.66	786.1	662.1	93.06	11.08	2.28	24.68	0.09	NSAID, GC, DMARD
2	male	36	6	249.6	320	120	23	3.32	2.27	100	82.67	4.22	11.8	49.31	30.13	49.75	0.78	0.37	1.76	1633.81	84.38	235.71	963.74	588.84	479.46	7.52	3.57	16.96	0.21
2	female	26	15	1600	40	64	10.7	2.81	0.78	89	86.68	7.65	4.17	53.1	32.49	7.99	1.01	0.89	2.66	3051.65	273.79	149.06	1839.45	1125.47	146.97	18.58	16.37	48.93	0.33	NSAID, GC, DMARD
2	female	60	18	0	11.4	37	11.8	3.59	0.75	4	68.58	18.61	10.9	41.85	23.54	21.95	2.15	1.24	5.66	1538.15	422.64	247.53	926.6	521.28	203.39	19.92	11.49	52.45	0.22	NSAID
2	female	68	3.25	97.6	20.8	100	17.1	3.65	0.93	20.6	63	11	24	30	32	39.04	2.71	0.6	7.28	1096	188	429	497	544	194	13	3	36	0.08	NSAID, GC, DMARD
2	female	51	5	1600	80	30	16.3	2.84	1.12	10.6	79	12	7	50	23	26.29	1.67	0.61	4.74	1097	161	100	727	326	191	12	4	34	0.13
2	female	56	5.17	285.3	74.6	43	18	4.76	1.8	5.86	68.88	18.52	7.68	51.38	16.54	10.73	1.67	0.99	4.11	1195.65	305.96	126.95	934.69	300.91	100.29	15.61	9.25	38.42	0.24	NSAID
2	male	49	1.66	1600	320	33	14.2	1.85	2.11	5.6	72.45	6.03	20.37	39.2	31.55	10.73	1.61	0.75	4.87	1099.26	84.96	286.73	638.41	513.93	68.5	10.28	4.79	31.09	0.15	NSAID, DMARD, Biological agent
2	female	62	22	46.6	178	120	16.3	6.75	0.82	60.7	68.77	14.4	13.55	44.94	21	13.28	0.92	1.11	5.28	598.95	122.58	115.33	400.26	186.99	53.15	3.68	4.44	21.13	0.21	NSAID
2	male	88	2	1600	80	83	13.5	2.27	1.55	42.1	74.68	4.24	18.45	45.68	25.61	10.85	1.08	0.47	5.65	410.54	22.51	98	259.82	145.69	28.1	2.8	1.22	14.63	0.08	NSAID
2	female	46	12	187.6	11.4	46	9.03	1.87	1.06	2.96	58	13	25	47	7	5.88	2.11	0.8	12.44	1013	222	434	840	125	49.39	17.72	6.72	104.5	0.06	NSAID, DMARD
2	female	64	4	301.2	320	120	20.1	3.52	1.63	108	85	2	12	46	38	1.24	0.72	0.25	3.48	912	23	130	499	406	6.19	3.59	1.25	17.37	0.07	NSAID, GC
2	male	76	7	674.9	320	18	9.58	2.69	1.44	19.7	83.42	8.24	6.09	62.17	18.52	15.81	0.4	0.67	1.92	1231.8	132.17	97.69	839.34	250.06	132.7	3.36	5.62	16.12	0.35	NSAID, DMARD, Biological agent
2	female	30	1.25	0	11.4	95	6.61	1.09	1.47	19.3	91.8	3.51	3.81	53.31	35.7	13.36	1.24	0.9	2.3	1965.98	72.42	78.63	1183.75	792.71	158.15	14.68	10.65	27.23	0.39	NSAID
2	male	60	6	48.4	20	64	12.7	4.24	1.06	19.8	76.82	9.6	11.9	43.29	29.77	18.33	0.67	0.67	2.32	2219.33	273.68	339.36	1267.05	871.29	232.25	8.49	8.49	29.4	0.29	NSAID, DMARD
2	female	55	1.17	309	1280	120	15.2	4.97	4.74	37.7	80.63	11.17	5.69	43.22	32.37	30	1.26	0.64	1.34	1138.75	155.66	79.31	618.65	463.31	185.6	7.79	3.96	8.29	0.48	NSAID, GC, DMARD
2	female	66	40	1600	40	87	12.9	2.57	0.71	25.8	78.69	3.15	17.05	41.79	34.12	58.27	0.72	0.26	2.4	1843.63	77.43	418.77	931.26	760.3	542.65	6.71	2.42	22.35	0.11	NSAID, GC
2	male	60	1	518.8	20	23	13.4	1.03	0.8	3.71	80	5	11	56	21	16.1	2.11	0.49	6.9	1015	60	131	767	284	123	16	4	53	0.07	NSAID, DMARD
2	female	61	0.17	1600	40	46	18.6	1.75	1.05	4.4	77.7	11.53	9.27	43.69	21.94	9	1.1	0.68	2.28	1493.87	214.44	172.37	867.08	435.47	78.04	9.54	5.9	19.77	0.3	NSAID, DMARD
2	female	25	5	103.7	80	18	12.9	2.22	3.17	3.35	76.24	18.78	3.68	37.47	32.48	17.1	0.65	1.73	1.2	1595.38	392.01	76.83	786.14	681.42	134.43	5.11	13.6	9.43	1.44	NSAID
2	female	46	15	0	11.4	46	17.6	1.97	0.91	29.2	65.51	23.09	10	44.58	19.77	32.21	1.44	2	1.87	1225.12	436.61	189.04	824.11	365.48	265.45	1.44	16.48	15.41	1.07	NSAID, GC
2	female	47	6	451.1	31.3	13	10.9	2.72	0.8	2.92	64.98	23.59	8.67	37.77	23.49	13.33	0.76	0.21	4.72	1283.68	464.18	170.71	749	465.84	99.84	5.69	1.57	35.35	0.04	NSAID, DMARD
2	female	55	7	0	11.4	120	23.1	2.43	2.69	40	85.49	5	7.61	71.7	12.48	10.31	1.11	0.9	2	1034.65	62.35	94.82	841.28	146.47	86.74	9.34	7.57	16.83	0.45	NSAID
2	female	36	2	368	29.9	24	12	2.95	0.75	10.8	85.46	8.69	4.35	45.51	37.08	16.1	1.21	0.71	3	1100.93	106.5	53.25	615.19	501.31	99.05	7.44	4.37	18.46	0.24	NSAID, GC, DMARD
2	female	65	6	290.4	40	120	11.9	3.71	2.04	133	92.2	3.54	2.67	41.97	45.18	6	0.41	0.5	2.08	1643.1	59.95	45.26	785.77	845.9	47.15	3.22	3.93	16.34	0.24	NSAID, GC
2	male	45	1.16	52.8	160	57	17.6	2.91	1.01	16.8	77.97	7.42	14.47	25.98	45.32	23.31	1.04	2	1.72	1555.89	151.67	295.8	506.03	882.66	117.96	5.26	10.12	8.7	1.16	NSAID
2	female	55	20	364.6	160	87	12.9	2.95	1	28.8	81.75	7.65	10.1	43.4	37.19	16.84	1.16	2.11	5	806.52	75.3	99.38	429.22	367.78	72.28	4.98	9.06	21.46	0.42	GC
2	male	62	0.67	474.7	320	46	12.9	3.44	0.95	13.1	77.3	16.34	3.43	43.22	33.11	35.22	0.78	2	2.13	1782.86	387.95	81.37	967.25	740.91	340.67	7.54	19.35	20.6	0.94	NSAID, DMARD
2	female	35	1	0	138	64	12.5	2.66	0.78	19.5	77.61	13.42	6.96	47.65	26.12	16.12	1.88	0.47	2.29	1470.31	257.96	133.76	889.38	487.58	143.37	16.72	4.18	20.37	0.21	NSAID
2	female	52	20	1600	80.9	40	10.5	3.02	0.57	10.4	69.29	10.54	18.63	34.81	31	18.47	1.42	2	9.15	652.13	95.95	169.58	338.62	301.54	62.54	4.81	6.77	30.98	0.22	NSAID, DMARD
2	female	40	6	1505.5	160	120	15.4	3.57	2.63	54.1	68.48	17.49	13.3	39.59	27.18	42.38	0.73	0.67	4.65	700.43	174.98	133.08	413.74	284.03	175.34	3.02	2.77	19.24	0.14	NSAID
2	female	77	1	349.7	597	30	9.65	1.8	1.07	32.4	74.72	13.78	10.53	43.37	27.01	44.4	0.67	0.52	1.44	2759.52	521.58	398.59	1566.1	972.9	695.35	10.49	8.14	22.55	0.36	GC
2	female	51	8	348.9	157	100	11.2	4.36	1.39	71	81.55	8.68	7.35	58.31	12.91	19.23	1.45	0.48	3.28	1447.77	155.09	131.28	1028.51	227.78	197.78	14.91	4.94	33.74	0.15
2	male	52	1	1600	40	3	9.48	1.22	0.85	7.92	77.43	13.91	8.55	42.22	26.84	23.87	2.41	0.52	5.86	1588.22	280.36	172.21	881.21	560.13	210.34	21.14	4.58	51.64	0.09
2	female	56	20	1391.7	640	100	15.6	5.4	3.1	23.4	78.72	3.33	16.58	48.26	34.92	30	1.26	0.72	4.8	1176.2	49.5	246.84	723.74	523.77	217.12	9.12	5.21	34.74	0.15	GC, DMARD
2	female	54	4	487.3	80	30	10.5	3.94	1.85	6.58	68.4	12.47	16.27	27.61	26.75	32.97	0.69	1.23	5.05	749.29	155.72	203.21	258.77	250.7	85.32	1.79	3.18	13.07	0.24	NSAID, GC, DMARD
2	female	50	25	200.6	713	120	19.7	5	3.41	68.8	82.99	6.13	10.02	43.23	40.09	8.74	1.9	0.44	6.62	1383.11	106.91	174.73	686.95	637.08	60.04	13.05	3.02	45.48	0.07	NSAID
2	female	55	30	309.6	160	70	15.7	3.12	2.97	88.2	83.64	9.95	5.37	48.32	32	31.71	1.14	0.63	3.42	686.33	81.62	44.01	396.61	262.62	125.77	4.52	2.5	13.56	0.18	GC, DMARD
2	male	30	14	202.3	13.7	1	8.72	5.42	0.51	5.06	70.04	13.74	12.85	33.53	27.19	12.14	0.75	0.99	5.03	1813.08	340.23	318.04	906.29	735	110.02	6.8	8.97	45.59	0.2
2	male	63	4	395.8	20	83	16.4	3.12	0.73	16.3	84	4	11	27	56	5.61	2.01	1.4	7.4	1172	58	147	383	797	21.49	7.7	5.36	28.34	0.19	GC
2	female	63	28	389.6	640	72	16.7	5.22	1.26	59.8	80.66	14.52	2.16	40.14	36.54	15	0.53	1.1	4.72	1354.32	239.94	35.77	684.55	623.18	102.68	3.63	7.53	32.31	0.23	NSAID, GC, DMARD
2	female	74	8	1600	640	120	15.5	6.79	1.21	200	72.86	2.84	19.53	50.84	20.51	6.78	0.72	1.2	7.2	639.81	24.29	166.94	458.25	184.85	31.07	3.3	5.5	32.99	0.17	GC, DMARD
2	female	57	0.08	807.6	75.9	36	11.9	2.05	0.37	19.4	63.57	23.81	8.3	44.41	23.81	6	1	0.32	5	1073.42	401.25	139.89	751.45	335.54	45.09	7.51	2.4	37.57	0.06
2	female	64	13	217.8	320	33	20.2	0.87	2.24	1	70.52	11.58	15.07	45.56	21.9	18.26	0.74	1	4.64	1231.08	196.56	255.77	818.37	393.4	149.43	6.06	8.18	37.97	0.22	NSAID, GC, DMARD, Biological agent
2	female	67	5	1600	320	40	20	5.93	1.14	54.1	65.07	11.89	22.02	39.56	20.97	22.18	0.82	0.85	4	988.5	188.84	349.59	574.06	304.39	127.33	4.71	4.88	22.96	0.21	NSAID
2	male	55	0.25	0	160	13	11.8	2.54	1.38	9.75	83.15	11.89	2.94	39.46	37.46	49	0.82	1.26	1.62	2936.42	406.37	100.33	1439.9	1366.82	705.55	11.81	18.14	23.33	0.78	GC, DMARD
2	female	54	20	118.6	106	68	14.8	5.36	0.8	23.9	53.49	13.43	31.6	31.71	19.2	11.54	0.46	0.32	1.9	1182	297.16	699.25	699.7	423.67	65.47	2.61	1.82	10.78	0.17
2	female	73	7	1232.5	67.7	108	20.5	4.25	1.29	29.3	58.95	8.36	31.78	32.64	27.21	10.8	2	1.04	4.72	702.93	98.54	378.99	379.1	316.07	40.94	7.58	3.94	17.89	0.22
2	male	36	10	67.6	11.4	7	13.6	6.26	1.19	7.35	68.66	12.15	17.38	30.07	37.09	35.6	0.44	0.74	3.82	3877.3	682.42	975.91	1707.62	2106.35	607.91	7.51	12.64	65.23	0.19	NSAID
2	female	42	4	1600	40	40	25.8	3.73	0.77	3.2	79.96	4.49	14.66	32.98	49.48	26.74	0.62	0.73	3.77	1770.02	96.01	313.79	753.46	1130.44	201.48	4.67	5.5	28.41	0.19	Biological agent
2	female	49	8	45.2	381	36	10.3	2.91	1.04	7.6	63.52	20.27	13.41	20.27	28.04	6	1	1	4.2	1200.69	382.69	253.29	622.3	530.61	37.34	6.22	6.22	26.14	0.24	GC, DMARD, DMARD
2	female	47	5.25	61.4	160	20	9.36	2.32	1.35	16	71.8	15.1	10.8	49.39	20.4	28	0.78	1.2	3.67	1249.39	261.34	186.91	863.95	356.92	241.91	6.74	10.37	31.71	0.33	DMARD
2	female	26	5	459.9	640	25	13.6	3.07	1.96	17.6	72	17	8	35	35	15.9	1.34	1.15	3.52	934	215	103	459	460	72.98	6.15	5.28	16.16	0.33	NSAID, GC, DMARD
2	female	44	1	717.7	305	120	18.3	2.94	1.32	107	84.79	5.11	7.45	50.43	28.57	6	1.05	0.42	3.72	824.6	50.36	73.38	483.46	273.92	29.01	5.08	2.03	17.98	0.11	GC
2	male	62	2.5	575.5	80	50	14.9	3.3	1.4	22	77.09	6.44	14.68	48.36	28.43	38.5	0.67	0.5	4.6	1561.27	121.68	277.37	1046.6	615.26	411.35	7.16	5.34	49.15	0.11	NSAID
2	female	61	18	175.4	160	18	8.66	2.96	1.18	3.13	70.77	8.93	16.96	57.08	12.01	21.86	1.14	0.96	3.36	1709	225.65	428.59	1378.4	290.02	239.37	12.48	10.52	36.79	0.29	NSAID, GC, DMARD
2	female	61	30	43.1	1280	120	12.9	3.43	1.73	80.6	72.23	11.74	14.56	44.74	20.28	7.28	0.72	0.23	3.5	826.76	129.56	160.77	530.87	240.66	38.65	3.82	1.22	18.58	0.07	GC, DMARD
2	female	60	7	1600	40	20	11	1.53	1.58	7.22	73.33	9.1	17.4	51.18	22.23	4.64	0.63	0.4	2.66	2049.3	236.3	486.26	1430.29	621.24	71.01	9.64	6.12	40.71	0.15	NSAID, GC, DMARD, DMARD
Supplementary Material Description The supplementary material provides the original data including general information, inflammatory factors, auto-antibodies, the percentage and absolute number of peripheral lymphocyte subsets of total 100 RA and 100 RA-ILD patients, which can support the conclusion of the study.
